# Supplementary material for: Structural basis of family-wide Rab GTPase recognition by rabenosyn-5
Source: Springer Nature journal article supplement (doi:10.1038/nature03798), 2005-07-01
Supplement: 41586_2005_BFnature03798_MOESM1_ESM.pdf [file 41586_2005_BFnature03798_MOESM1_ESM.pdf]

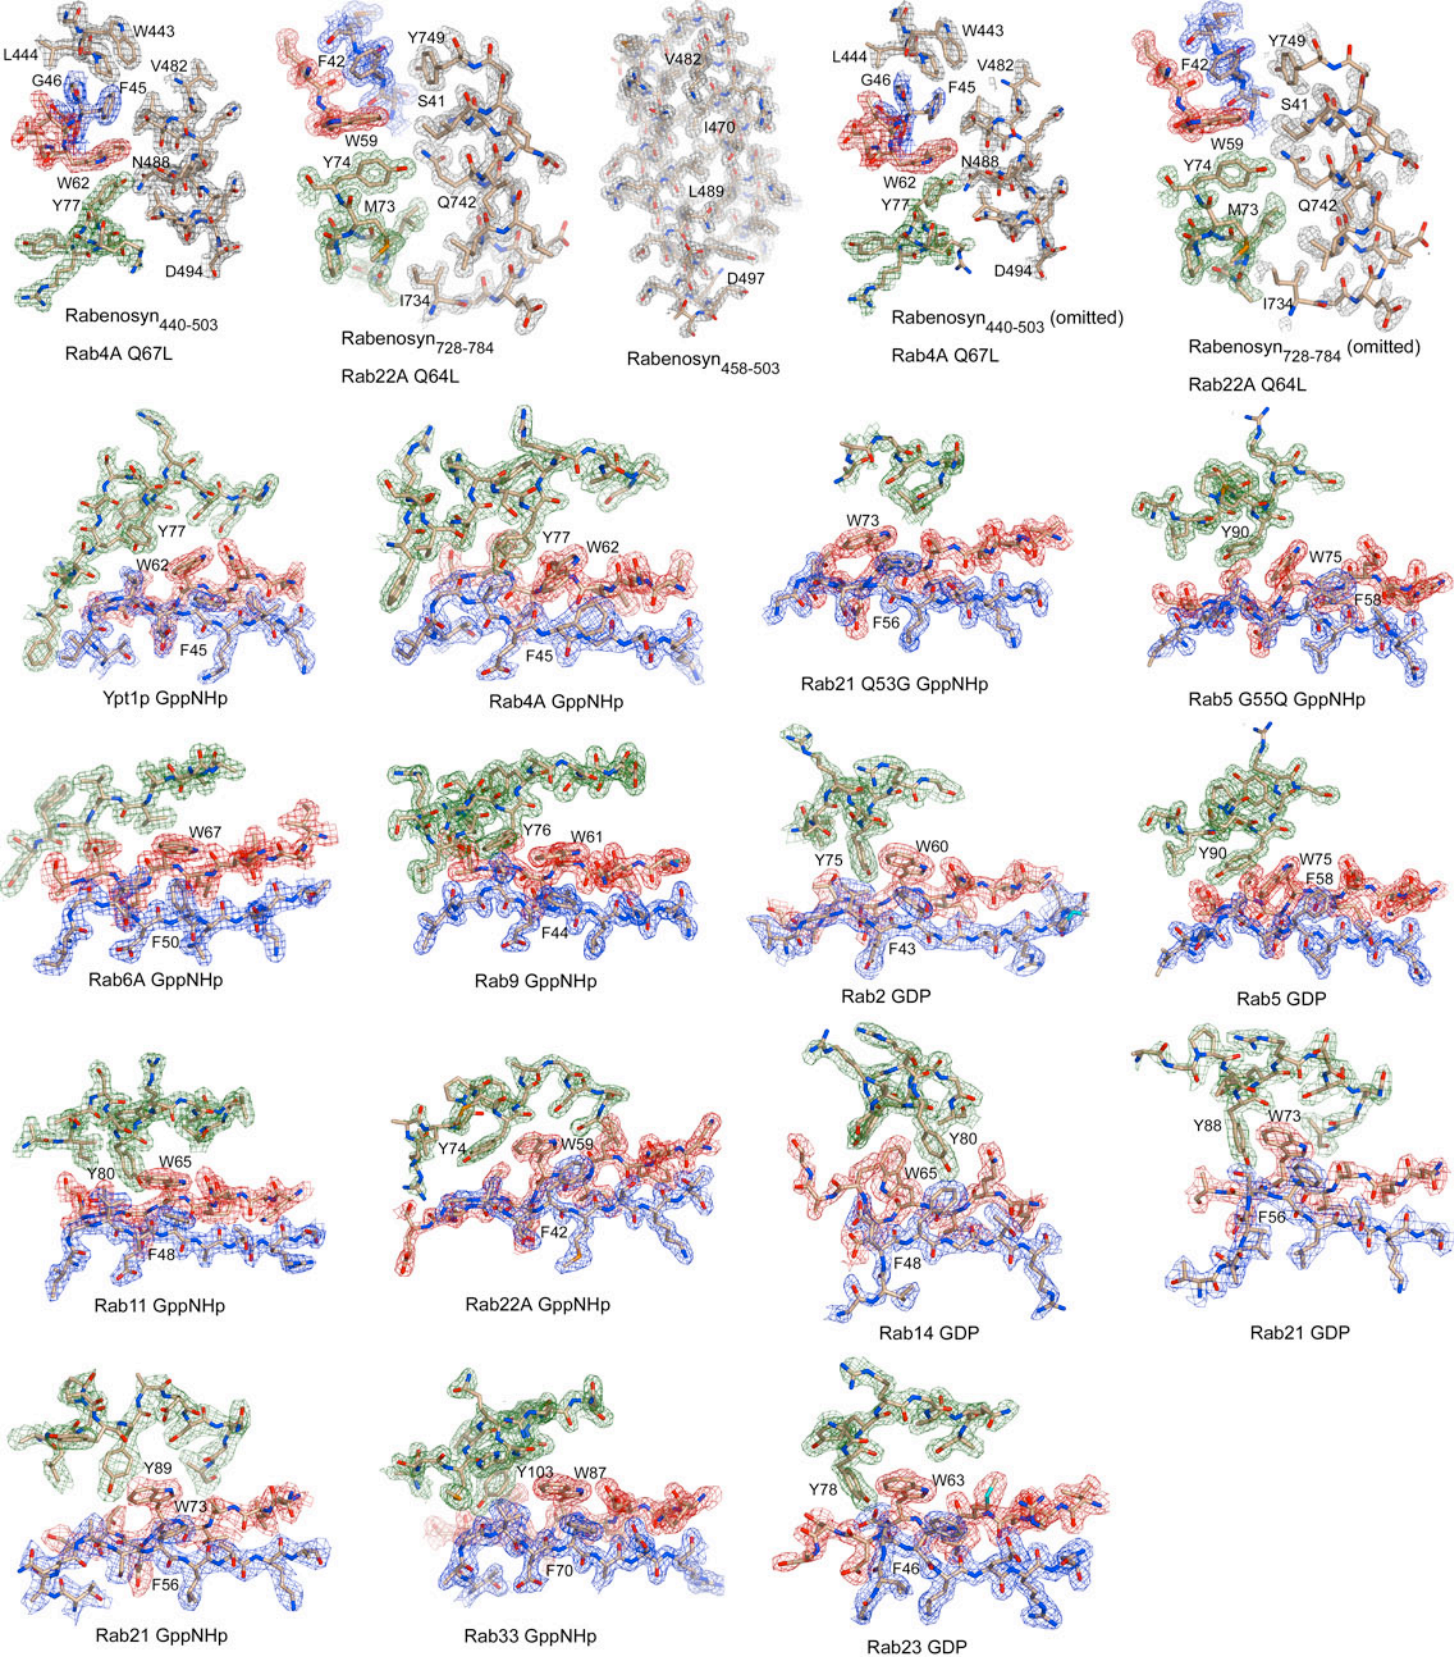

**Supplementary Figure 1.** Electron density for functionally relevant regions

Final refined models and  $\sigma_A$ -weighted  $2F_o - F_c$  electron density in the vicinity of the switch I (blue), interswitch (red), and switch II (green) regions as well as Rabenosyn-5 (gray). Maps were calculated with phases from the final refined models and contoured at  $1.2 \sigma$ . Omit maps (top right) were calculated following simulated annealing at 1000 °K and contoured at  $1.0 \sigma$ .
