# Supplementary material for: Structural basis of family-wide Rab GTPase recognition by rabenosyn-5
Source: Springer Nature journal article supplement (doi:10.1038/nature03798), 2005-07-01
Supplement: 41586_2005_BFnature03798_MOESM2_ESM.pdf [file 41586_2005_BFnature03798_MOESM2_ESM.pdf]

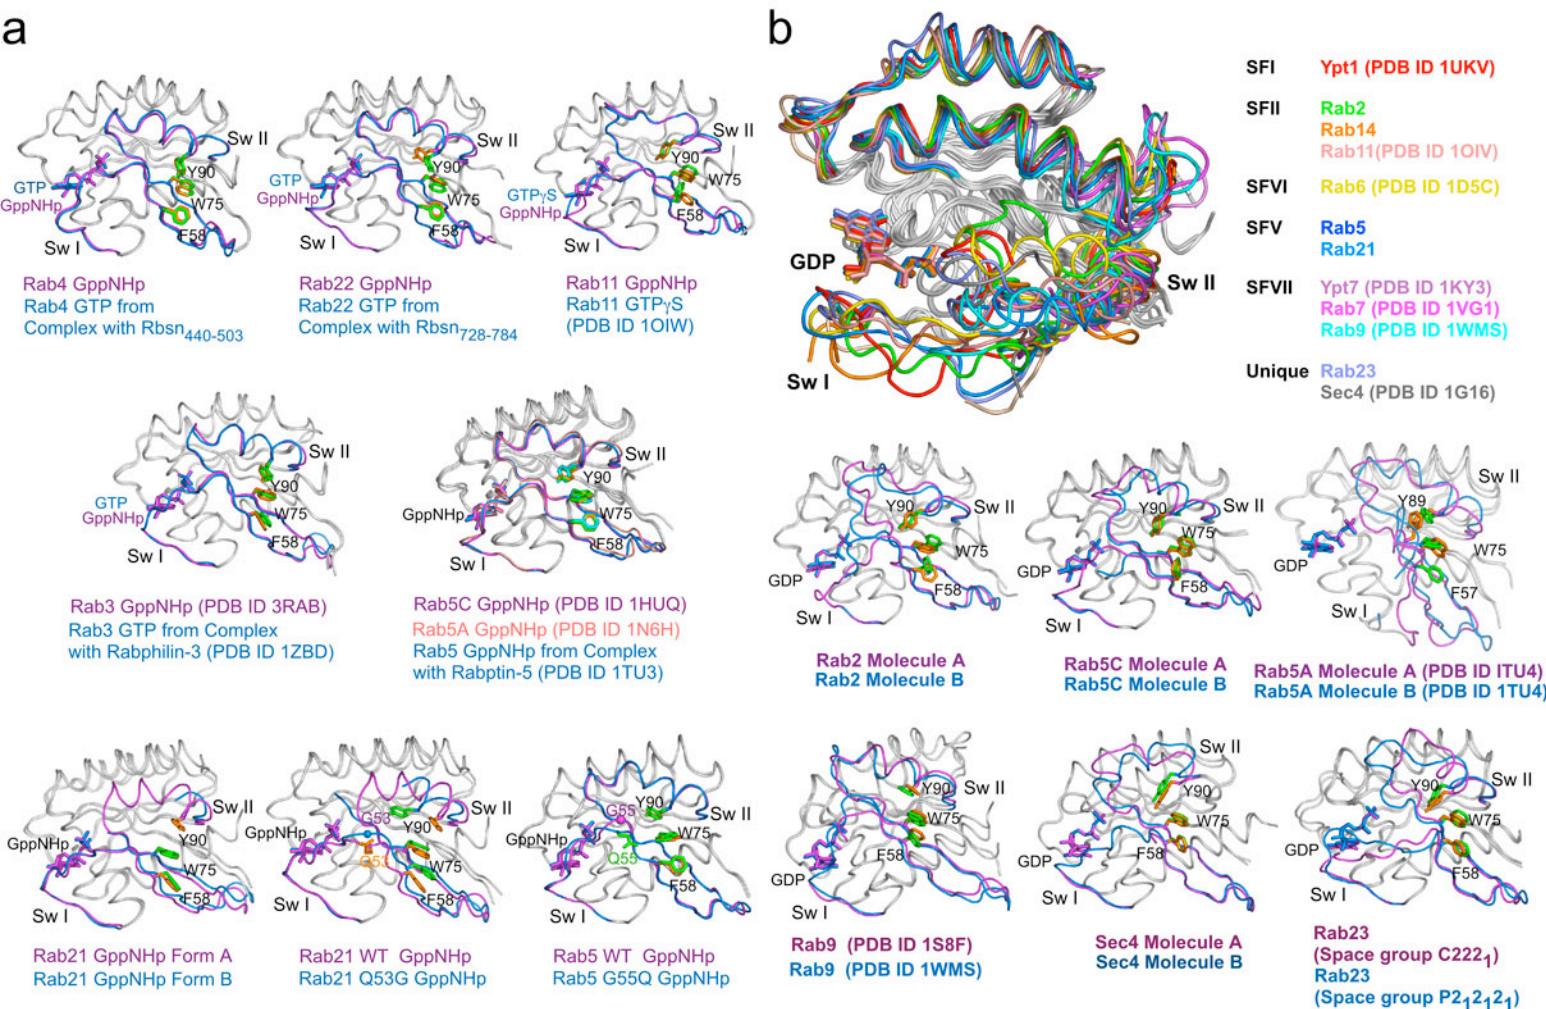

**Supplementary Figure 2.** Influence of crystal packing on the active and inactive structures of Rab GTPases  
**a**, Comparison of the active (GppNHp-, GTPγS-, or GTP-bound) structures of 7 Rab GTPases following pair wise superposition of C $\alpha$  atoms with the same Rab GTPase crystallized in a different space group or in complex with an effector. **b**, Comparison of the inactive (GDP-bound) structures of 12 Rab GTPases following pair wise superposition of C $\alpha$  atoms with Ypt1 (top), or another molecule in the asymmetric unit, or the same Rab GTPase crystallized in a different space group. Residue numbers correspond to Rab5C.
