# Supplementary material for: Structural basis of family-wide Rab GTPase recognition by rabenosyn-5
Source: Springer Nature journal article supplement (doi:10.1038/nature03798), 2005-07-01
Supplement: 41586_2005_BFnature03798_MOESM6_ESM.pdf [file 41586_2005_BFnature03798_MOESM6_ESM.pdf]

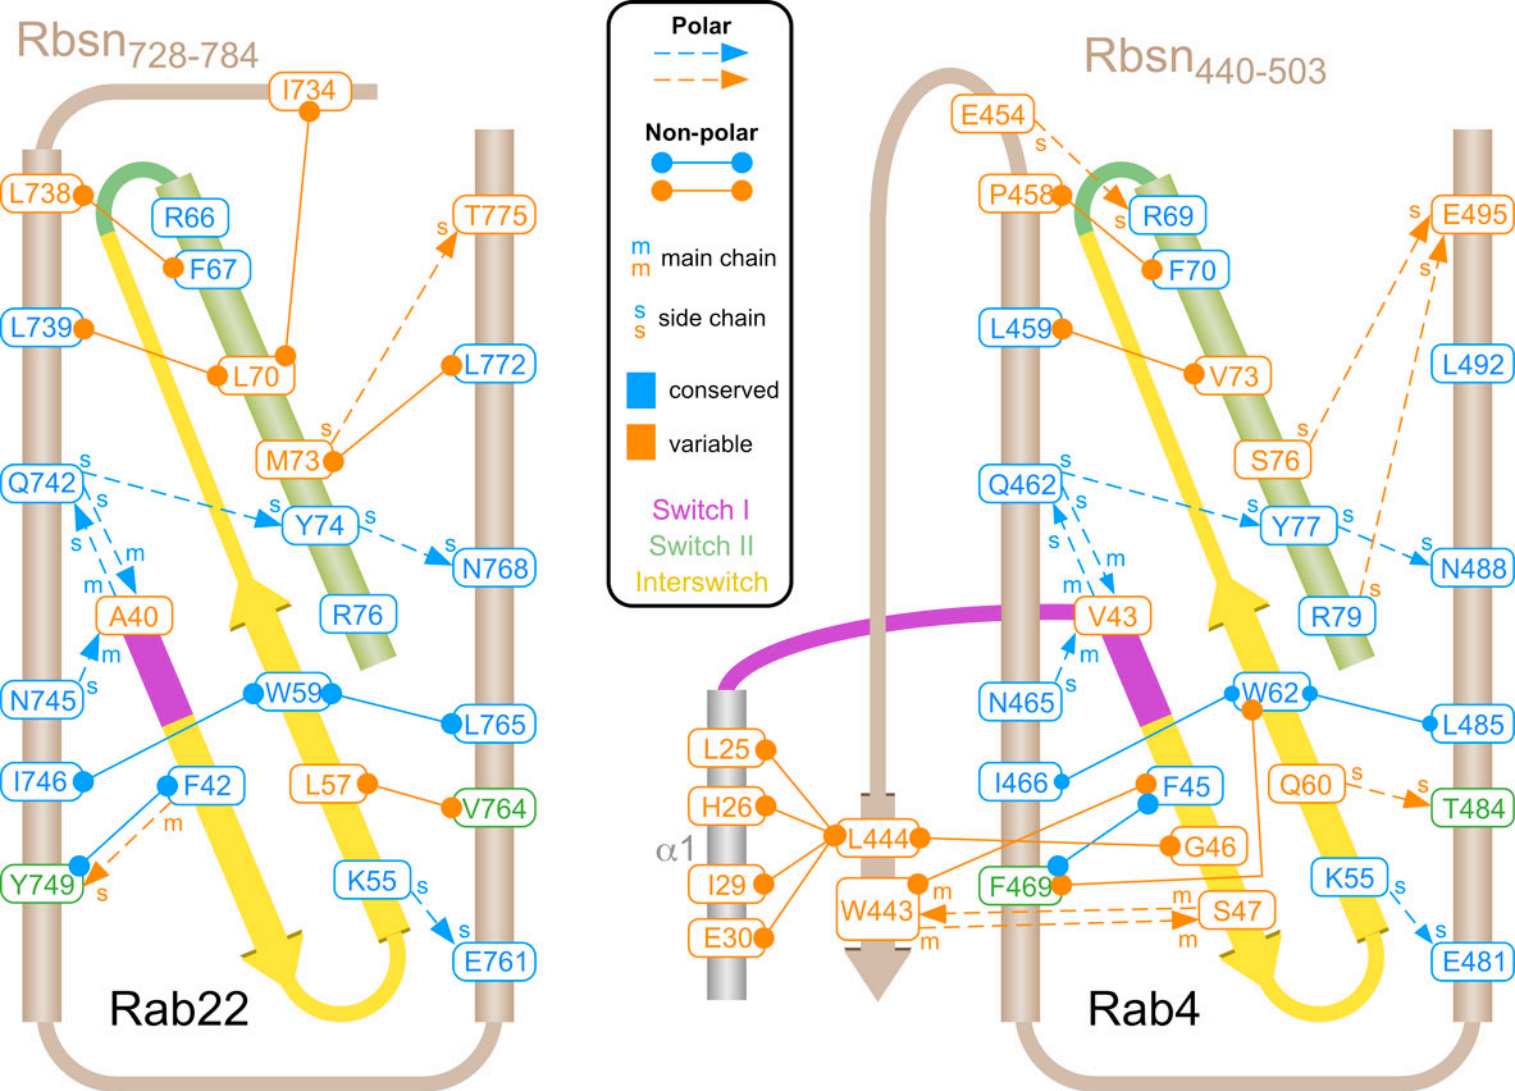

**Supplementary Figure 6.** Schematic diagram of intermolecular interactions in the Rab22-Rbsn<sub>728-784</sub> complex (left) and Rab4-Rbsn<sub>440-503</sub> complex (right).
