# Supplementary material for: Structural basis of family-wide Rab GTPase recognition by rabenosyn-5
Source: Springer Nature journal article supplement (doi:10.1038/nature03798), 2005-07-01
Supplement: 41586_2005_BFnature03798_MOESM7_ESM.pdf [file 41586_2005_BFnature03798_MOESM7_ESM.pdf]

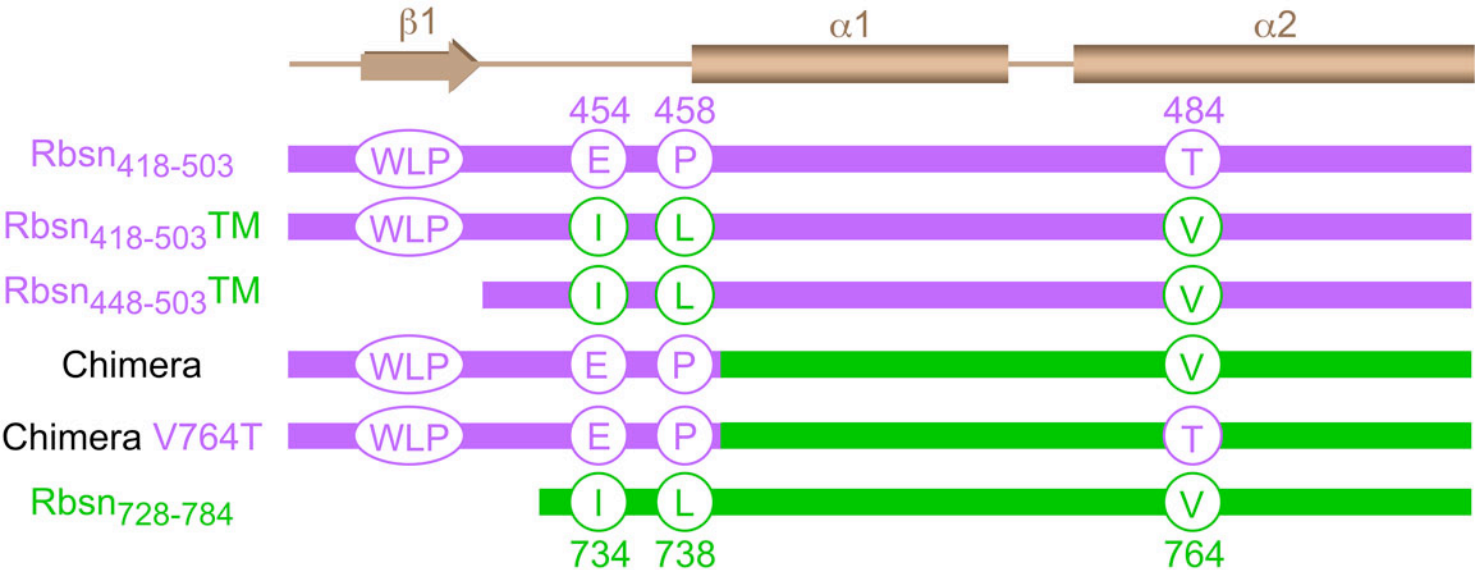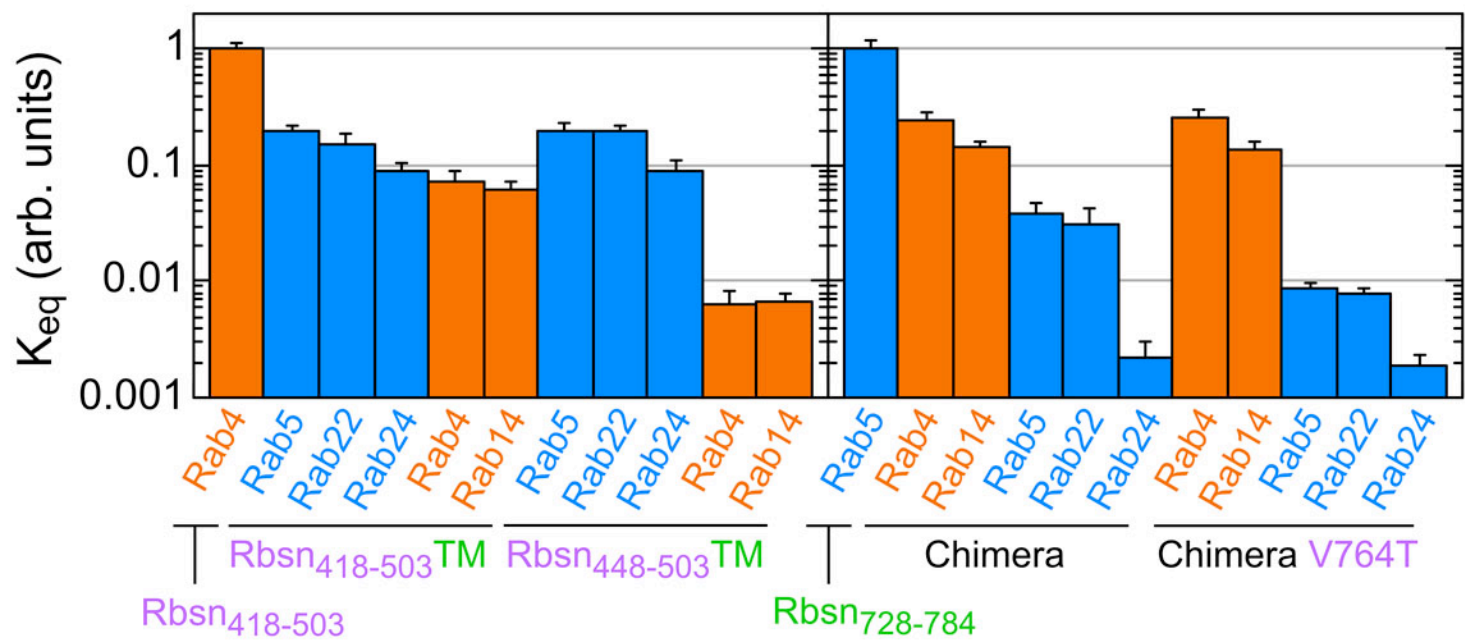

**Supplementary Figure 7.** Reversal of specificity mutations in the Rabenosyn-5 Rab binding domains

The affinities of 6xHis Rabenosyn-5 mutants for GST-fusions of Rab4, Rab5, Rab14, Rab22, and Rab24 were determined by SPR.
