# Supplementary material for: Structural basis of family-wide Rab GTPase recognition by rabenosyn-5
Source: Springer Nature journal article supplement (doi:10.1038/nature03798), 2005-07-01
Supplement: 41586_2005_BFnature03798_MOESM9_ESM.pdf [file 41586_2005_BFnature03798_MOESM9_ESM.pdf]

**Supplemental Table 2a. Crystallization, Data Collection and Refinement Statistics**

|                                               | <b>Rabenosyn<sub>440-503</sub><br/>Rab4A Q67L</b>          | <b>Rabenosyn<sub>728-784</sub><br/>Rab22A Q64L</b> | <b>Rabenosyn<sub>458-503</sub></b>            |
|-----------------------------------------------|------------------------------------------------------------|----------------------------------------------------|-----------------------------------------------|
| <b>Crystallization</b>                        |                                                            |                                                    |                                               |
| Precipitation solution                        | 20% PEG 4000, 200mM NH <sub>4</sub> F,<br>50mM MES, pH 6.0 | 10% PEG 6000,<br>50mM Na acetate, pH 5.0           | 10% PEG 6000,<br>50mM Na acetate, pH 5.0      |
| Seeding                                       | none                                                       | Microseeded                                        | Microseeded                                   |
| Temperature (°C)                              | 18                                                         | 4                                                  | 4                                             |
| <b>Data Collection</b>                        |                                                            |                                                    |                                               |
| X-ray source                                  | RUH3R / MAR 300                                            | NLS X25                                            | RUH3R / MAR 300                               |
| Resolution (Å)                                | 20-1.90                                                    | 20-1.30                                            | 20-1.50                                       |
| Space group                                   | P3 <sub>1</sub> 21                                         | P2 <sub>1</sub> 2 <sub>1</sub> 2 <sub>1</sub>      | P2 <sub>1</sub> 2 <sub>1</sub> 2 <sub>1</sub> |
| Unit cell                                     |                                                            |                                                    |                                               |
| a, b, c (Å)                                   | 81.44, 81.44, 137.846                                      | 44.825, 55.515, 85.027                             | 26.366, 42.236, 43.059                        |
| α, β, γ (°)                                   | 90, 90, 120                                                | 90, 90, 90                                         | 90, 90, 90                                    |
| No. of mol. in AU                             | 2                                                          | 1                                                  | 1                                             |
| Completeness <sup>a</sup>                     | 99.6 (98.9)                                                | 85.1 (48.7)                                        | 93.0 (79.5)                                   |
| <I>/σ(I) <sup>a</sup>                         | 27.3 (4.0)                                                 | 54.1 (3.8)                                         | 19.5 (5.8)                                    |
| R <sub>sym</sub> <sup>a, b</sup>              | 0.054 (0.379)                                              | 0.038 (0.381)                                      | 0.070 (0.221)                                 |
| <b>Structure Determination and Refinement</b> |                                                            |                                                    |                                               |
| Search model                                  | Rab4A                                                      | Rab22A                                             | polyalanine-gp41<br>(PDB ID, 1AIK.pdb)        |
| R Factor                                      | 0.223                                                      | 0.169                                              | 0.195                                         |
| R <sub>free</sub>                             | 0.258                                                      | 0.208                                              | 0.209                                         |
| RMS deviations                                |                                                            |                                                    |                                               |
| Bond length (Å)                               | 0.008                                                      | 0.006                                              | 0.007                                         |
| Bond angle (°)                                | 1.302                                                      | 1.110                                              | 0.893                                         |

<sup>a</sup> Values in parentheses represent the highest resolution shell

$$^b R_{\text{sym}} = \frac{\sum_h \sum_j |I_j(h) - \langle I(h) \rangle|}{\sum_h \sum_j I_j(h)}$$

**Supplemental Table 2b. Crystallization, Data Collection and Refinement Statistics**

|                                               | <b>Ypt1p GppNHp</b>                            | <b>Rab4A GppNHp</b>                                                                         | <b>Rab6A GppNHp</b>                                                            |
|-----------------------------------------------|------------------------------------------------|---------------------------------------------------------------------------------------------|--------------------------------------------------------------------------------|
| <b>Crystallization</b>                        |                                                |                                                                                             |                                                                                |
| Precipitation solution                        | 30% MPD,<br>10% glycerol,<br>100mM MES, pH 6.5 | 1.6M (NH <sub>4</sub> ) <sub>2</sub> SO <sub>4</sub> ,<br>20% Glycerol,<br>50mM MES, pH 6.0 | 20% PEG 6000,<br>300mM MgCl <sub>2</sub> , 10% Glycerol,<br>50mM HEPES, pH 7.0 |
| Seeding                                       | none                                           | none                                                                                        | none                                                                           |
| Temperature (°C)                              | 18                                             | 4                                                                                           | 4                                                                              |
| <b>Data Collection</b>                        |                                                |                                                                                             |                                                                                |
| X-ray source                                  | RUH3R / MAR 300                                | RUH3R / MAR 300                                                                             | RUH3R / MAR 300                                                                |
| Resolution (Å)                                | 20-2.05                                        | 20-2.05                                                                                     | 20-1.78                                                                        |
| Space group                                   | P2 <sub>1</sub> 2 <sub>1</sub> 2 <sub>1</sub>  | P4 <sub>3</sub> 2 <sub>1</sub> 2                                                            | P2 <sub>1</sub> 2 <sub>1</sub> 2 <sub>1</sub>                                  |
| Unit cell                                     |                                                |                                                                                             |                                                                                |
| a, b, c (Å)                                   | 39.011, 56.930, 74.720                         | 68.808, 68.808, 90.72                                                                       | 40.495, 68.072, 73.102                                                         |
| α, β, γ (°)                                   | 90, 90, 90                                     | 90, 90, 90                                                                                  | 90, 90, 90                                                                     |
| No. of mol. in AU                             | 1                                              | 1                                                                                           | 1                                                                              |
| Completeness <sup>a</sup>                     | 99.2 (99.7)                                    | 98.9 (96.6)                                                                                 | 99.4 (95.1)                                                                    |
| <I>/σ(I) <sup>a</sup>                         | 18.1 (4.7)                                     | 15.1 (4.1)                                                                                  | 27.7 (6.2)                                                                     |
| R <sub>sym</sub> <sup>a, b</sup>              | 0.068 (0.293)                                  | 0.078 (0.282)                                                                               | 0.058 (0.282)                                                                  |
| <b>Structure Determination and Refinement</b> |                                                |                                                                                             |                                                                                |
| Search model                                  | polyalanine Rab3A                              | polyalanine Rab3A                                                                           | polyalanine Rab3A                                                              |
| R Factor                                      | 0.192                                          | 0.133                                                                                       | 0.215                                                                          |
| R <sub>free</sub>                             | 0.252                                          | 0.182                                                                                       | 0.249                                                                          |
| RMS deviations                                |                                                |                                                                                             |                                                                                |
| Bond length (Å)                               | 0.011                                          | 0.019                                                                                       | 0.010                                                                          |
| Bond angle (°)                                | 1.414                                          | 1.807                                                                                       | 1.287                                                                          |

<sup>a</sup> Values in parentheses represent the highest resolution shell

<sup>b</sup>  $R_{\text{sym}} = \frac{\sum_h \sum_j |I_j(h) - \langle I(h) \rangle|}{\sum_h \sum_j I_j(h)}$

**Supplemental Table 2c. Crystallization, Data Collection and Refinement Statistics**

|                                               | <b>Rab9 GppNHp</b>                                          | <b>Rab11A GppNHp</b>                        | <b>Rab22A GppNHp</b>                                                  |
|-----------------------------------------------|-------------------------------------------------------------|---------------------------------------------|-----------------------------------------------------------------------|
| <b>Crystallization</b>                        |                                                             |                                             |                                                                       |
| Precipitation solution                        | 20% PEG 6000, 200mM MgCl <sub>2</sub> ,<br>50mM MES, pH 6.0 | 1.4M NaCl, 20% Glycerol<br>50mM MES, pH 6.0 | 20% PEG 6000, 10% Glycerol<br>1M LiCl <sub>2</sub> , 50mM MES, pH 6.0 |
| Seeding                                       | none                                                        | none                                        | Microseeded                                                           |
| Temperature (°C)                              | 4                                                           | 4                                           | 4                                                                     |
| <b>Data Collection</b>                        |                                                             |                                             |                                                                       |
| X-ray source                                  | RUH3R / MAR 300                                             | RUH3R / MAR 300                             | RUH3R / MAR 300                                                       |
| Resolution (Å)                                | 20-1.85                                                     | 20-2.0                                      | 20-1.90                                                               |
| Space group                                   | P3 <sub>2</sub> 21                                          | I422                                        | P4 <sub>3</sub> 2 <sub>1</sub> 2                                      |
| Unit cell                                     |                                                             |                                             |                                                                       |
| a, b, c (Å)                                   | 68.325, 68.325, 83.229                                      | 44.825, 55.515, 85.027                      | 45.455, 45.455, 150.146                                               |
| α, β, γ (°)                                   | 90, 90, 120                                                 | 90, 90, 90                                  | 90, 90, 90                                                            |
| No. of mol. in AU                             | 1                                                           | 1                                           | 1                                                                     |
| Completeness <sup>a</sup>                     | 99.2 (98.5)                                                 | 99.8 (97.8)                                 | 99.9 (99.2)                                                           |
| <I>/σ(I) <sup>a</sup>                         | 26.2 (5.0)                                                  | 31.6 (7.6)                                  | 33.9 (10.4)                                                           |
| R <sub>sym</sub> <sup>a, b</sup>              | 0.06 (0.394)                                                | 0.058 (0.252)                               | 0.086 (0.224)                                                         |
| <b>Structure Determination and Refinement</b> |                                                             |                                             |                                                                       |
| Search model                                  | polyalanine Rab4A                                           | polyalanine Rab5C                           | polyalanine Rab3A                                                     |
| R Factor                                      | 0.191                                                       | 0.176                                       | 0.187                                                                 |
| R <sub>free</sub>                             | 0.221                                                       | 0.222                                       | 0.241                                                                 |
| RMS deviations                                |                                                             |                                             |                                                                       |
| Bond length (Å)                               | 0.008                                                       | 0.007                                       | 0.006                                                                 |
| Bond angle (°)                                | 1.197                                                       | 1.065                                       | 1.051                                                                 |

<sup>a</sup> Values in parentheses represent the highest resolution shell

<sup>b</sup>  $R_{\text{sym}} = \sum_h \sum_j |I_j(h) - \langle I(h) \rangle| / \sum_h \sum_j I_j(h)$

**Supplemental Table 2d. Crystallization, Data Collection and Refinement Statistics**

|                                               | <b>Rab21 GppNHp</b>                                             | <b>Rab21 GppNHp</b>                                             | <b>Rab33 GppNHp</b>                                                          |
|-----------------------------------------------|-----------------------------------------------------------------|-----------------------------------------------------------------|------------------------------------------------------------------------------|
| <b>Crystallization</b>                        |                                                                 |                                                                 |                                                                              |
| Precipitation solution                        | 15% PEG 4000, 10% Glycerol,<br>200mM NaSCN,<br>50mM MES, pH 6.5 | 18% PEG 6000,<br>200mM LiSO <sub>4</sub> ,<br>50mM Tris, pH 8.0 | 10% PEG 4000, 10% Glycerol,<br>150mM LiSO <sub>4</sub> ,<br>50mM MES, pH 6.0 |
| Seeding                                       | Microseeded                                                     | Microseeded                                                     | none                                                                         |
| Temperature (°C)                              | 4                                                               | 4                                                               | 4                                                                            |
| <b>Data Collection</b>                        |                                                                 |                                                                 |                                                                              |
| X-ray source                                  | RUH3R / MAR 300                                                 | RUH3R / MAR 300                                                 | RUH3R / MAR 300                                                              |
| Resolution (Å)                                | 20-2.5                                                          | 20-2.05                                                         | 20-1.80                                                                      |
| Space group                                   | I2 <sub>1</sub> 2 <sub>1</sub> 2 <sub>1</sub>                   | C2                                                              | P3 <sub>2</sub>                                                              |
| Unit cell                                     |                                                                 |                                                                 |                                                                              |
| a, b, c (Å)                                   | 77.834, 99.719, 105.760                                         | 130.357, 36.567, 86.666                                         | 56.194, 56.194, 55.039                                                       |
| α, β, γ (°)                                   | 90, 90, 90                                                      | 90, 113.404, 90                                                 | 90, 90, 120                                                                  |
| No. of mol. in AU                             | 2                                                               | 2                                                               | 1                                                                            |
| Completeness <sup>a</sup>                     | 95.6 (99.2)                                                     | 99.9 (99.6)                                                     | 96.7 (84.2)                                                                  |
| <I>/σ(I) <sup>a</sup>                         | 21.2 (4.8)                                                      | 15.8 (3.8)                                                      | 29.0 (7.7)                                                                   |
| R <sub>sym</sub> <sup>a, b</sup>              | 0.067 (0.387)                                                   | 0.080 (0.368)                                                   | 0.057 (0.249)                                                                |
| <b>Structure Determination and Refinement</b> |                                                                 |                                                                 |                                                                              |
| Search model                                  | polyalanine Rab3A                                               | polyalanine Rab3A                                               | polyalanine Rab5C                                                            |
| R Factor                                      | 0.225                                                           | 0.228                                                           | 0.169                                                                        |
| R <sub>free</sub>                             | 0.282                                                           | 0.268                                                           | 0.216                                                                        |
| RMS deviations                                |                                                                 |                                                                 |                                                                              |
| Bond length (Å)                               | 0.006                                                           | 0.009                                                           | 0.021                                                                        |
| Bond angle (°)                                | 0.992                                                           | 1.238                                                           | 1.923                                                                        |

<sup>a</sup> Values in parentheses represent the highest resolution shell

<sup>b</sup>  $R_{\text{sym}} = \frac{\sum_h \sum_j |I_j(h) - \langle I(h) \rangle|}{\sum_h \sum_j I_j(h)}$

**Supplemental Table 2e. Crystallization, Data Collection and Refinement Statistics**

|                                               | <b>Rab21 Q53G GppNHp</b>                                                            | <b>Rab5C G55Q GppNHp</b>                      |
|-----------------------------------------------|-------------------------------------------------------------------------------------|-----------------------------------------------|
| <b>Crystallization</b>                        |                                                                                     |                                               |
| Precipitation solution                        | 20% PEG 4000,<br>200mM Mg(CH <sub>3</sub> COO) <sub>2</sub> ,<br>50mM HEPES, pH 7.0 | 10% PEG 6000,<br>50mM MES, pH 6.0             |
| Seeding                                       | none                                                                                | none                                          |
| Temperature (°C)                              | 4                                                                                   | 4                                             |
| <b>Data Collection</b>                        |                                                                                     |                                               |
| X-ray source                                  | RUH3R / MAR 300                                                                     | RUH3R / MAR 300                               |
| Resolution (Å)                                | 20-1.8                                                                              | 20-1.80                                       |
| Space group                                   | C2                                                                                  | P2 <sub>1</sub> 2 <sub>1</sub> 2 <sub>1</sub> |
| <b>Unit cell</b>                              |                                                                                     |                                               |
| a, b, c (Å)                                   | 91.200, 77.425, 107.965                                                             | 36.317, 64.008, 66.314                        |
| α, β, γ (°)                                   | 90.0, 89.8, 90.0                                                                    | 90, 90, 90                                    |
| No. of mol. in AU                             | 4                                                                                   | 1                                             |
| Completeness <sup>a</sup>                     | 98.4 (97.6)                                                                         | 97.1 (73.4)                                   |
| <I>/σ(I) <sup>a</sup>                         | 14.4 (3.4)                                                                          | 16.0 (5.0)                                    |
| R <sub>sym</sub> <sup>a, b</sup>              | 0.064 (0.311)                                                                       | 0.058 (0.229)                                 |
| <b>Structure Determination and Refinement</b> |                                                                                     |                                               |
| Search model                                  | polyalanine Rab3A                                                                   | polyalanine Rab5C                             |
| R Factor                                      | 0.172                                                                               | 0.161                                         |
| R <sub>free</sub>                             | 0.218                                                                               | 0.209                                         |
| <b>RMS deviations</b>                         |                                                                                     |                                               |
| Bond length (Å)                               | 0.005                                                                               | 0.009                                         |
| Bond angle (°)                                | 1.025                                                                               | 1.147                                         |

<sup>a</sup> Values in parentheses represent the highest resolution shell

<sup>b</sup>  $R_{\text{sym}} = \sum_h \sum_j |I_j(h) - \langle I(h) \rangle| / \sum_h \sum_j I_j(h)$

**Supplemental Table 2f. Crystallization, Data Collection and Refinement Statistics**

|                                               | <b>Rab2A GDP</b>                                                    | <b>Rab5C GDP</b>                                                   | <b>Rab14 GDP</b>                                           |
|-----------------------------------------------|---------------------------------------------------------------------|--------------------------------------------------------------------|------------------------------------------------------------|
| <b>Crystallization</b>                        |                                                                     |                                                                    |                                                            |
| Precipitation solution                        | 15% PEG 4000,<br>400mM LiSO <sub>4</sub> ,<br>100mM Citrate, pH 5.5 | 10% PEG 4000,<br>200mM LiSO <sub>4</sub><br>50mM NaAcetate, pH 4.5 | 7% PEG 6000, 100mM CaCl <sub>2</sub><br>50mM HEPES, pH 7.0 |
| Seeding                                       | Microseeded                                                         | Microseeded                                                        | Microseeded                                                |
| Temperature (°C)                              | 18                                                                  | 18                                                                 | 18                                                         |
| <b>Data Collection</b>                        |                                                                     |                                                                    |                                                            |
| X-ray source                                  | NLSL X25                                                            | RUH3R / MAR 300                                                    | RUH3R / MAR 300                                            |
| Resolution (Å)                                | 20-2.12                                                             | 20-2.20                                                            | 20-2.05                                                    |
| Space group                                   | P2 <sub>1</sub> 2 <sub>1</sub> 2                                    | P2 <sub>1</sub> 2 <sub>1</sub> 2 <sub>1</sub>                      | P2 <sub>1</sub>                                            |
| Unit cell                                     |                                                                     |                                                                    |                                                            |
| a, b, c (Å)                                   | 98.773, 128.473, 68.236                                             | 38.401, 70.931, 137.610                                            | 43.065, 40.780, 47.678                                     |
| α, β, γ (°)                                   | 90, 90, 90                                                          | 90, 90, 90                                                         | 90, 108.446, 90                                            |
| No. of mol. in AU                             | 4                                                                   | 2                                                                  | 1                                                          |
| Completeness <sup>a</sup>                     | 98.7 (99.2)                                                         | 98.6 (97.3)                                                        | 97.4 (84.9)                                                |
| <I>/σ(I) <sup>a</sup>                         | 32.9 (3.7)                                                          | 17.0 (4.0)                                                         | 16.1 (3.6)                                                 |
| R <sub>sym</sub> <sup>a, b</sup>              | 0.069 (0.377)                                                       | 0.088 (0.407)                                                      | 0.122 (0.386)                                              |
| <b>Structure Determination and Refinement</b> |                                                                     |                                                                    |                                                            |
| Search model                                  | polyalanine Rab4A                                                   | polyalanine Rab3A                                                  | polyalanine Rab4A                                          |
| R Factor                                      | 0.226                                                               | 0.181                                                              | 0.201                                                      |
| R <sub>free</sub>                             | 0.265                                                               | 0.235                                                              | 0.255                                                      |
| RMS deviations                                |                                                                     |                                                                    |                                                            |
| Bond length (Å)                               | 0.006                                                               | 0.008                                                              | 0.008                                                      |
| Bond angle (°)                                | 0.972                                                               | 1.228                                                              | 1.105                                                      |

<sup>a</sup> Values in parentheses represent the highest resolution shell

<sup>b</sup>  $R_{\text{sym}} = \frac{\sum_h \sum_j |I_j(h) - \langle I(h) \rangle|}{\sum_h \sum_j I_j(h)}$

**Supplemental Table 2g. Crystallization, Data Collection and Refinement Statistics**

|                                               | <b>Rab21 GDP</b>                                                                                                  | <b>Rab23 GDP</b>                                    | <b>Rab23 GDP</b>                                                      |
|-----------------------------------------------|-------------------------------------------------------------------------------------------------------------------|-----------------------------------------------------|-----------------------------------------------------------------------|
| <b>Crystallization</b>                        |                                                                                                                   |                                                     |                                                                       |
| Precipitation solution                        | 20% PEG 6000, 10% Glycerol,<br>200mM (NH <sub>4</sub> ) <sub>2</sub> SO <sub>4</sub> ,<br>50mM Na acetate, pH 4.5 | 27% PEG 6000,<br>200mM Citrate,<br>50mM MES, pH 6.0 | 15% PEG 6000,<br>50mM CH <sub>3</sub> COONa<br>50mM NaAcetate, pH 5.0 |
| Seeding                                       | Microseeded                                                                                                       | Microseeded                                         | Microseeded                                                           |
| Temperature (°C)                              | 4                                                                                                                 | 4                                                   | 4                                                                     |
| <b>Data Collection</b>                        |                                                                                                                   |                                                     |                                                                       |
| X-ray source                                  | RUH3R / MAR 300                                                                                                   | RUH3R / MAR 300                                     | RUH3R / MAR 300                                                       |
| Resolution (Å)                                | 20-2.30                                                                                                           | 20-2.06                                             | 20-1.90                                                               |
| Space group                                   | C222 <sub>1</sub>                                                                                                 | C222 <sub>1</sub>                                   | P2 <sub>1</sub> 2 <sub>1</sub> 2 <sub>1</sub>                         |
| Unit cell                                     |                                                                                                                   |                                                     |                                                                       |
| a, b, c (Å)                                   | 36.295, 88.861, 118.030                                                                                           | 67.010, 71.333, 65.684                              | 40.281, 61.640, 63.850                                                |
| α, β, γ (°)                                   | 90, 90, 90                                                                                                        | 90, 90, 90                                          | 90, 90, 90                                                            |
| No. of mol. in AU                             | 1                                                                                                                 | 1                                                   | 1                                                                     |
| Completeness <sup>a</sup>                     | 97.7 (96.2)                                                                                                       | 98.9 (89.2)                                         | 95.6 (79.4)                                                           |
| <I>/σ(I) <sup>a</sup>                         | 17.4 (4.3)                                                                                                        | 16.4 (4.3)                                          | 24.5 (5.3)                                                            |
| R <sub>sym</sub> <sup>a, b</sup>              | 0.159 (0.448)                                                                                                     | 0.097(0.306)                                        | 0.044 (0.268)                                                         |
| <b>Structure Determination and Refinement</b> |                                                                                                                   |                                                     |                                                                       |
| Search model                                  | polyalanine Rab21                                                                                                 | polyalanine Rab3A                                   | polyalanine Rab3A                                                     |
| R Factor                                      | 0.249                                                                                                             | 0.179                                               | 0.210                                                                 |
| R <sub>free</sub>                             | 0.276                                                                                                             | 0.224                                               | 0.261                                                                 |
| RMS deviations                                |                                                                                                                   |                                                     |                                                                       |
| Bond length (Å)                               | 0.008                                                                                                             | 0.009                                               | 0.011                                                                 |
| Bond angle (°)                                | 1.178                                                                                                             | 1.205                                               | 1.232                                                                 |

<sup>a</sup> Values in parentheses represent the highest resolution shell

<sup>b</sup>  $R_{\text{sym}} = \sum_h \sum_j |I_j(h) - \langle I(h) \rangle| / \sum_h \sum_j I_j(h)$
